# Supplementary material for: Hexaethylsubporphyrins: β-alkyl analogues in the subporphyrin family
Source: Royal Society of Chemistry journal article supplement (doi:10.1039/c5dt03864b), 2015-01-01
Supplement: c5dt03864b1.pdf [file c5dt03864b1.pdf]

## Supporting Information

### Hexaethylsubporphyrins: $\beta$ -alkyl analogues in subporphyrin family

Brijesh Chandra, B. Sathish Kumar, Navendu Mondal, Anunay Samanta and  
Pradeepta K. Panda\*

School of Chemistry, University of Hyderabad, Hyderabad-500046, India

Email: [pkpsc@uohyd.ernet.in](mailto:pkpsc@uohyd.ernet.in); [pradeepta.panda@gmail.com](mailto:pradeepta.panda@gmail.com)

#### Instrumentation and materials

Crystallographic data for **4** and **5.DN** collected on Oxford Gemini A Ultra diffractometer with dual source. Cu-K $\alpha$  ( $\lambda = 1.54184 \text{ \AA}$ ) radiation was used to collect the X-ray reflections of the crystal. Data reduction was performed using CrysAlisPro 171.33.55 software.<sup>S1</sup> Structures were solved and refined using SHELXL-97<sup>S2</sup> with anisotropic displacement parameters for non-H atoms. Hydrogen atoms on O and N were experimentally located in difference electron density maps. All C–H atoms were fixed geometrically using HFIX command in SHELX-TL with anisotropic displacement parameters for non-H atoms. All H atoms of **4** and **5.DN** were fixed geometrically. Empirical absorption correction was done using spherical harmonics, implemented in SCALE3 ABSPACK scaling algorithm. A check of the final CIF file using PLATON<sup>S3</sup> did not show any missed symmetry. In case of **5.DN** some solvent accessible voids were observed. The contribution to the scattering factors from this was removed by SQUEEZE<sup>S4</sup> in PLATON. PLATON was used as incorporated in WinGX.<sup>S5</sup> Crystallographic data (excluding the structure factor) for the structure **4** and **5.DN** in this paper has been deposited in the Cambridge Crystallographic Data Centre as supplementary publication numbers CCDC 1414845-1414846. Copy of the data can be obtained free of charge on application to CCDC, 12 Union Road, Cambridge CB2 1EZ, UK (Fax: +44(0)-1223-336033 or e-mail: [deposit@ccdc.cam.ac.uk](mailto:deposit@ccdc.cam.ac.uk)) or via [www.ccdc.cam.ac.uk/data\\_request/cif](http://www.ccdc.cam.ac.uk/data_request/cif).

#### Synthesis of 3,5-dinitrobenzylalcoxo-2,3,7,8,12,13-hexaethyl(subporphyrinato)boron(III) (**5.DN**).

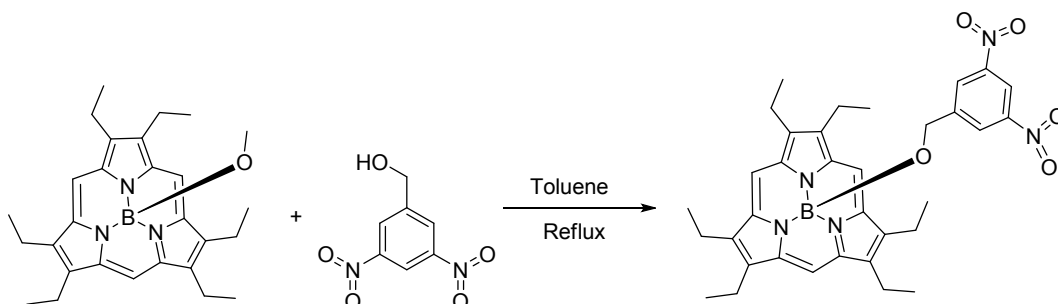

**5** (9.0 mg, 0.02 mmol) and 3,5-dinitrobenzylalcohol (4.9 mg, 0.024 mmol) were taken in R.B. and dissolved in toluene (5.0 mL) and the reaction mixture was heated to reflux for 30 min. Reaction mixture was cooled and solvent was evaporated. Crude was passed through a thin silica gel column pad and the **5.DN** was obtained as a yellow powder in quantitative yield by eluting with EtOAc/hexane (10%). Single crystal for X-ray diffraction analysis was grown from slow diffusion of hexane in to ether solution of **5.DN**.

$^1\text{H}$  NMR (500 MHz,  $\text{CDCl}_3$ )  $\delta$  (ppm) 8.64 (br, 1H, -ArCH), 8.62 (s, 3H, -*meso*), 7.16 (br, 2H, -Ar-CH), 3.30 (m, 12H,  $-\text{CH}_3\text{CH}_2$ ), 2.00 (br, 2H,  $-\text{OCH}_2$ ), 1.50 (m, 18H,  $-\text{CH}_3\text{CH}_2$ ).

$^{13}\text{C}$  NMR (125 MHz,  $\text{CDCl}_3$ )  $\delta$  (ppm) 147.4, 142.2, 133.8, 126.3, 125.1, 116.1, 98.3, 65.8, 18.7, 17.4.

$^{11}\text{B}$  NMR (160 MHz,  $\text{CDCl}_3$ )  $\delta$  (ppm) -15.3.

HR-ESI-MS (positive mode)  $m/z = 410.2764$  (calcd. for  $\text{C}_{27}\text{H}_{33}\text{BN}_3 = 410.2768$  [ $\text{M-DN}$ ] $^+$ ).

UV-Vis (in  $\text{CH}_2\text{Cl}_2$ )  $\lambda$  [nm] ( $\epsilon$  [ $\text{M}^{-1}\text{cm}^{-1}$ ]) 324 (12258), 339 (23623), 437 (1879), 463 (4151).

Fluorescence (in  $\text{CH}_2\text{Cl}_2$ ,  $\lambda_{\text{ex}} = 350$  nm)  $\lambda_{\text{max}}$  [nm] 467, 482, 499.

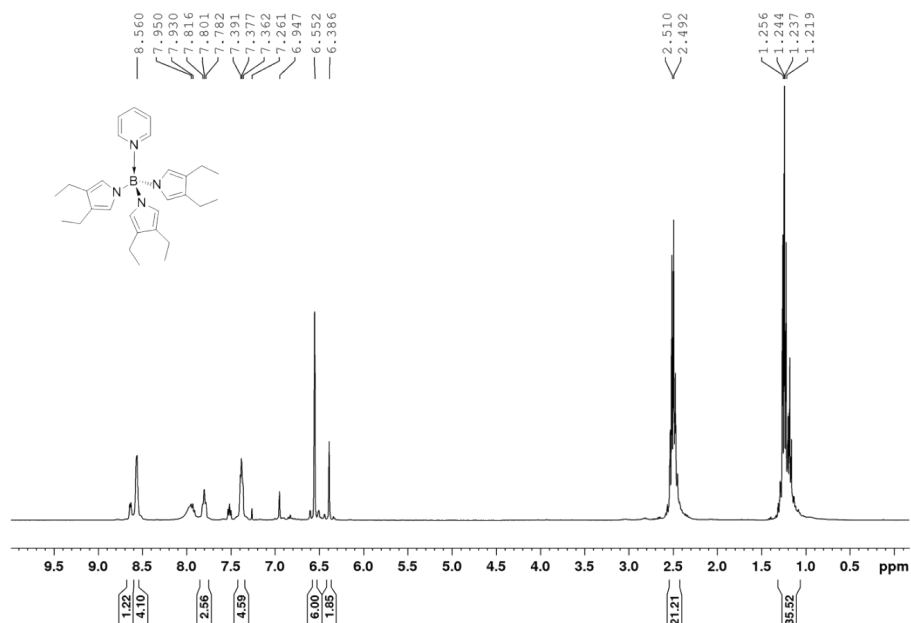

**Figure S1:**  $^1\text{H}$  NMR spectrum of **6** in  $\text{CDCl}_3$ .

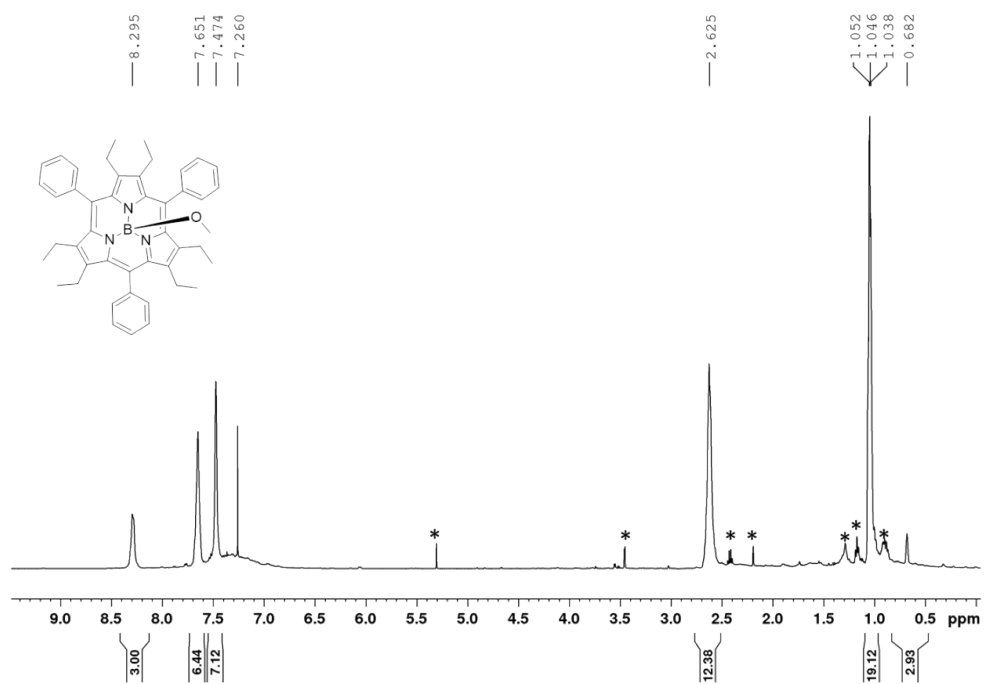

**Figure S2:**  $^1\text{H}$  NMR spectrum of **4** in  $\text{CDCl}_3$ .

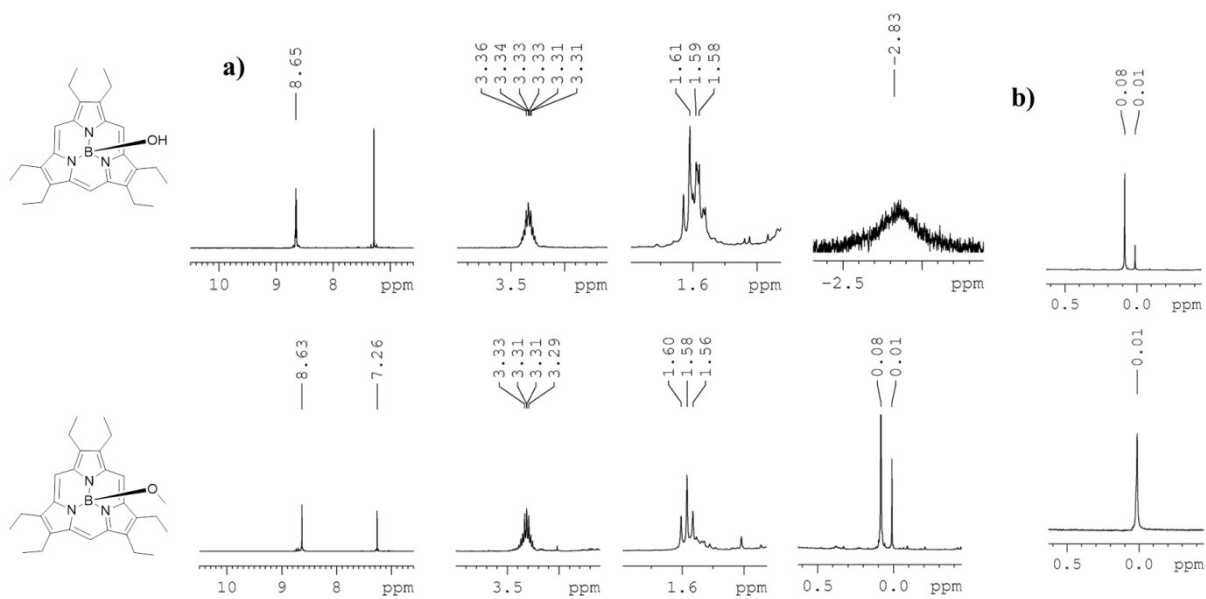

**Figure S3:** (a)  $^1\text{H}$  NMR spectrum of **5** in  $\text{CDCl}_3$ . (b)  $\text{MeOH-d}_4$ -exchange of B-OMe.

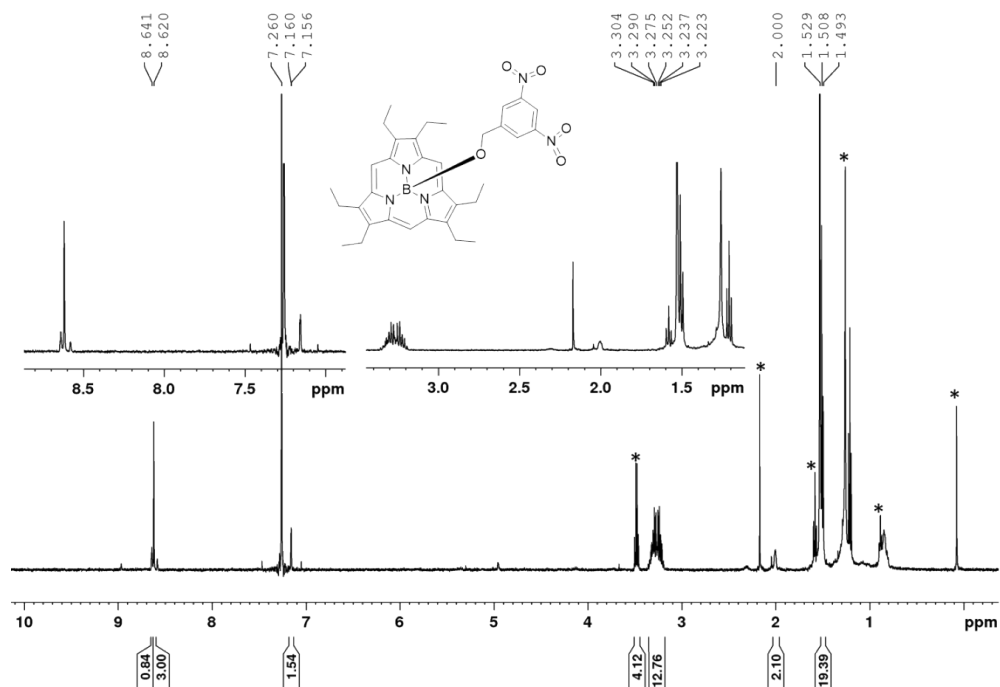

Figure S4: <sup>1</sup>H NMR spectrum of 5.DN in CDCl<sub>3</sub>.

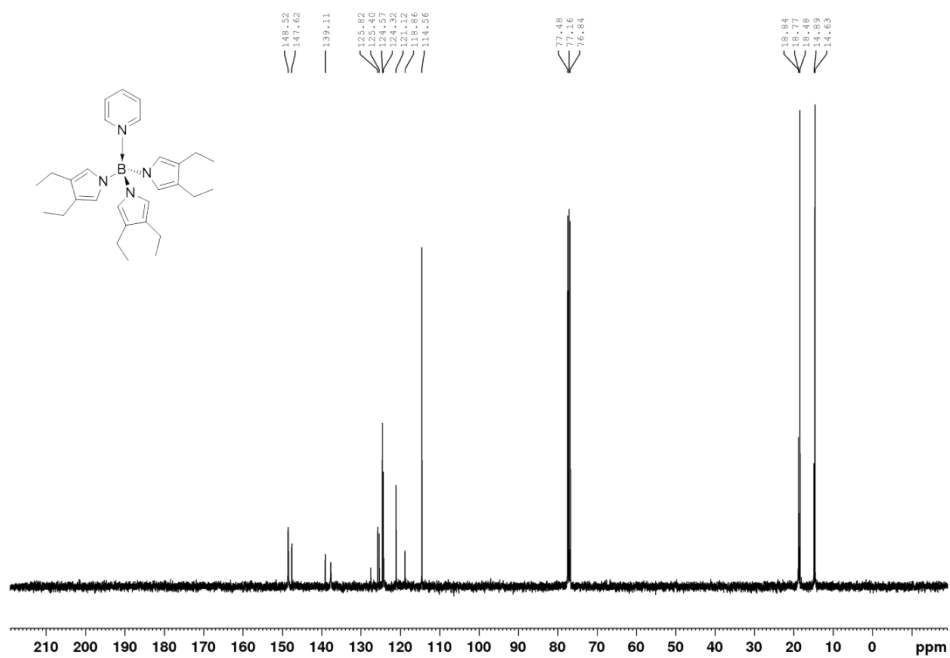

Figure S5: <sup>13</sup>C NMR spectrum of 6 in CDCl<sub>3</sub>.

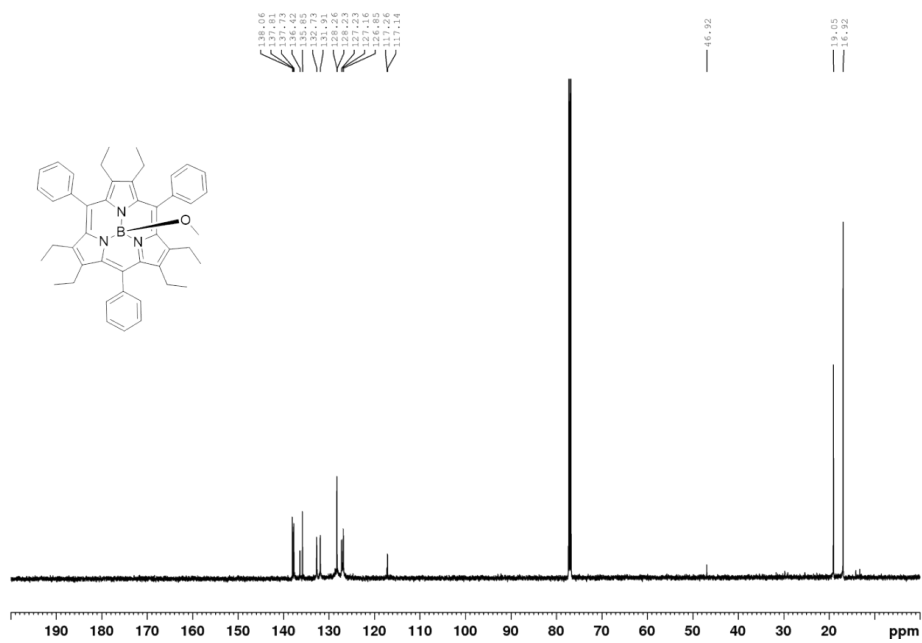

Figure S6:  $^{13}\text{C}$  NMR spectrum of **4** in  $\text{CDCl}_3$ .

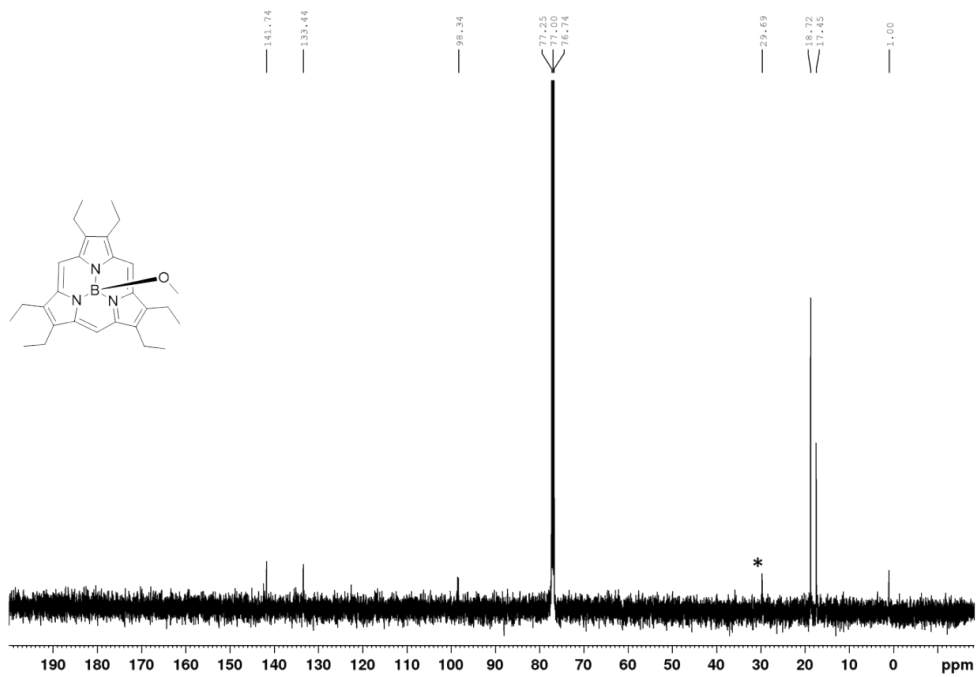

Figure S7:  $^{13}\text{C}$  NMR spectrum of **5** in  $\text{CDCl}_3$ .

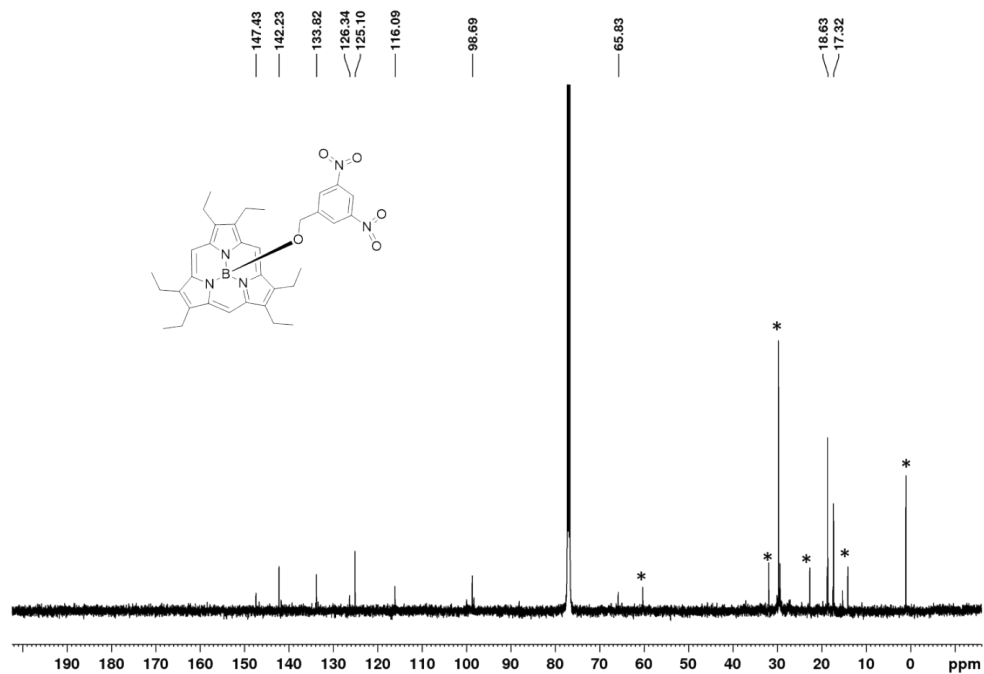

**Figure S8:**  $^{13}\text{C}$  NMR spectrum of **5.DN** in  $\text{CDCl}_3$ .

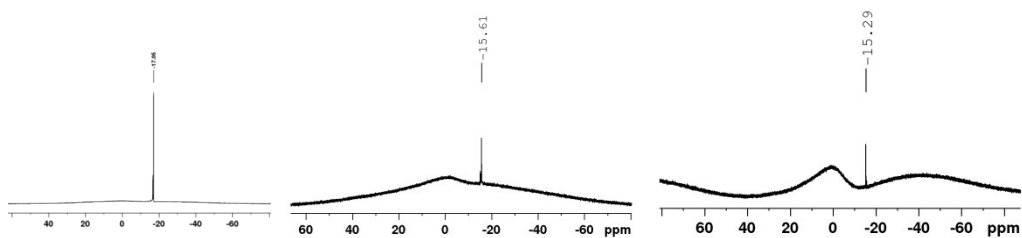

**Figure S9:**  $^{11}\text{B}$  NMR spectra of **4** (left) and **5** (middle) and **5.DN** (right) in  $\text{CDCl}_3$ .

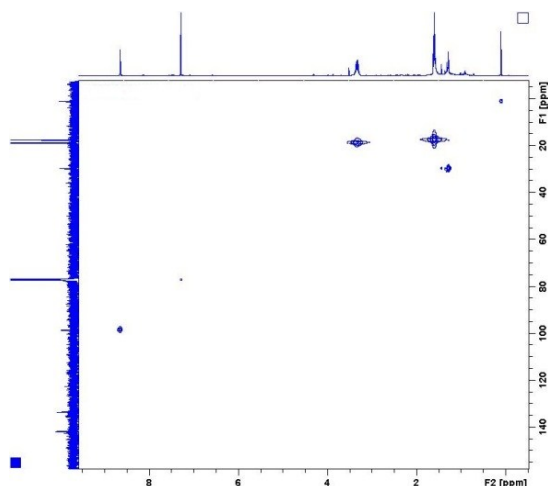

**Figure S10:** HMQC NMR spectrum of **5** in  $\text{CDCl}_3$ .

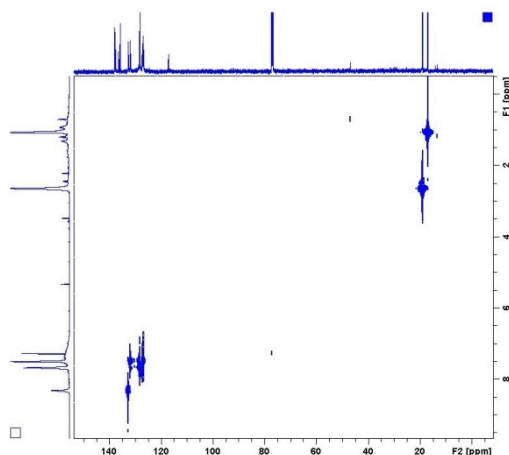

**Figure S11:**  $^1\text{H}$ - $^{13}\text{C}$  COSY NMR spectra of **4** in  $\text{CDCl}_3$ .

**IUCR check CIF Alerts:**

**Alert level A**

PLAT026\_ALERT\_3\_A Ratio Observed / Unique Reflections too Low .... 16 %

**Alert level B**

RFACR01\_ALERT\_3\_B The value of the weighted R factor is > 0.35

Weighted R factor given 0.392

PLAT084\_ALERT\_3\_B High wR2 Value (i.e. > 0.25) ..... 0.39 Report

PLAT230\_ALERT\_2\_B Hirshfeld Test Diff for N1 -- B1 .. 7.8 su

PLAT230\_ALERT\_2\_B Hirshfeld Test Diff for N4 -- C31 .. 7.3 su

PLAT340\_ALERT\_3\_B Low Bond Precision on C-C Bonds ..... 0.0159 Ang.

PLAT782\_ALERT\_2\_B Unusual Bond Geometry for C-NO2 Moiety Around N4 Check  
PLAT782\_ALERT\_2\_B Unusual Bond Geometry for C-NO2 Moiety Around N5 Check

**Author response:** After several attempts of crystallization the obtained crystal was the best. Its quality was not good and it was weakly diffracting, hence we failed to get good diffraction data even after long run of data collection. We have done the structure refinement in **SHELXL-97**, with some constraints which gave finally the best solution so far achieved.

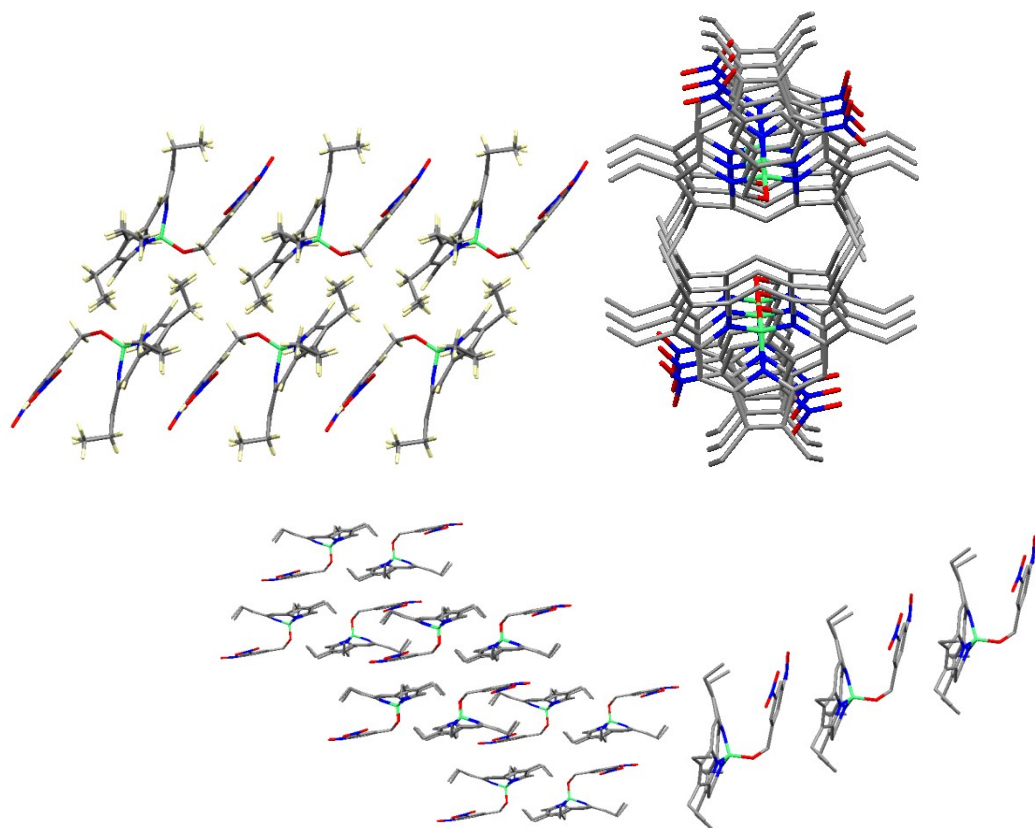

**Figure S12:** Crystal packing diagram of **5.DN**.



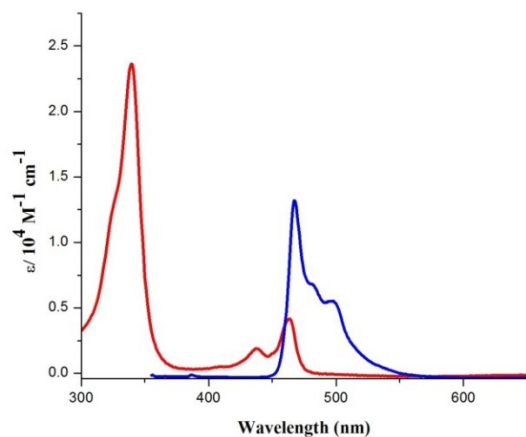

**Figure S13:** Uv-vis (red) and fluorescence (blue) spectra of **5.DN** in  $\text{CH}_2\text{Cl}_2$ .

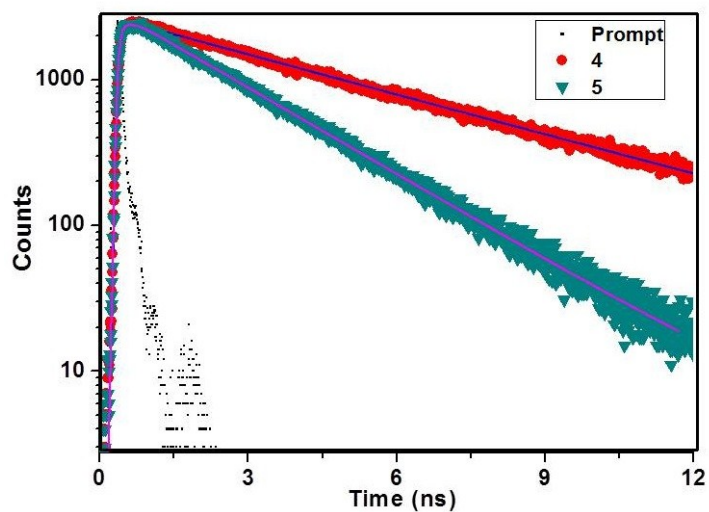

| Sample   | $\lambda_{\text{emission}}$ (nm) | $\tau_{\text{decay}}$ (a1) | $\chi^2$ |
|----------|----------------------------------|----------------------------|----------|
| <b>4</b> | 465                              | 4.68 ns (100%)             | 1.17     |
| <b>5</b> | 460                              | 2.19 ns (100%)             | 1.06     |

**Figure S14:** Fluorescence decay plot for **4** (red) and **5** (cyan) with prompt (black). Table summarizes the life average  $S_1$  life time calculated from TCSPC.

## DFT calculations:<sup>S6</sup>

**Table S1:** Transition, harmonic oscillator strength and symmetry calculated (H = HOMO, L = LUMO) from DFT for **4**.

| Wavelength (nm) | Osc. Strength | Symmetry  | Major contribs                                                                     |
|-----------------|---------------|-----------|------------------------------------------------------------------------------------|
| 427.3961069     | 0.001         | Singlet-A | H-1->LUMO (51%), HOMO->L+1 (48%)                                                   |
| 426.8075894     | 0.0007        | Singlet-A | H-1->L+1 (46%), HOMO->LUMO (52%)                                                   |
| 353.8539204     | 0.0223        | Singlet-A | H-2->LUMO (29%), H-2->L+1 (61%)                                                    |
| 348.1211193     | 0.0028        | Singlet-A | H-2->LUMO (60%), H-2->L+1 (31%)                                                    |
| 342.4008192     | 0.1645        | Singlet-A | H-3->LUMO (68%), H-1->L+1 (11%)                                                    |
| 336.0346288     | 0.6472        | Singlet-A | H-3->L+1 (10%), H-1->LUMO (19%), H-1->L+1 (20%), HOMO->LUMO (16%), HOMO->L+1 (19%) |
| 330.3755506     | 0.532         | Singlet-A | H-3->LUMO (14%), H-3->L+1 (12%), H-1->LUMO (17%), H-1->L+1 (10%), HOMO->L+1 (23%)  |
| 324.054722      | 0.1744        | Singlet-A | H-3->LUMO (11%), H-3->L+1 (66%)                                                    |
| 311.8528476     | 0.0335        | Singlet-A | H-4->LUMO (50%), H-4->L+1 (45%)                                                    |
| 305.1446842     | 0.0248        | Singlet-A | H-4->LUMO (43%), H-4->L+1 (49%)                                                    |
| 297.7505683     | 0.2537        | Singlet-A | H-5->LUMO (87%)                                                                    |
| 294.9877151     | 0.2342        | Singlet-A | H-5->L+1 (87%)                                                                     |
| 288.4272476     | 0.001         | Singlet-A | HOMO->L+2 (21%), HOMO->L+3 (68%)                                                   |
| 286.2893681     | 0.0035        | Singlet-A | HOMO->L+2 (45%), HOMO->L+3 (16%), HOMO->L+5 (18%)                                  |
| 284.8816356     | 0.0203        | Singlet-A | HOMO->L+2 (20%), HOMO->L+4 (27%), HOMO->L+5 (25%)                                  |
| 284.2415843     | 0.0105        | Singlet-A | H-1->L+2 (35%), H-1->L+3 (45%)                                                     |
| 283.5136097     | 0.0081        | Singlet-A | HOMO->L+4 (46%), HOMO->L+5 (23%)                                                   |
| 282.8087058     | 0.003         | Singlet-A | H-1->L+2 (46%), H-1->L+3 (38%)                                                     |
| 281.3327357     | 0.0058        | Singlet-A | H-1->L+4 (66%), H-1->L+5 (14%)                                                     |
| 280.7975192     | 0.0011        | Singlet-A | H-1->L+6 (14%), HOMO->L+5 (26%), HOMO->L+6 (42%)                                   |

**Table S2:** Transition, harmonic oscillator strength and symmetry calculated (H = HOMO, L = LUMO) from DFT for **5**.

| Wavelength (nm) | Osc. Strength | Symmetry  | Major contribs                                                   |
|-----------------|---------------|-----------|------------------------------------------------------------------|
| 419.344303      | 0.0288        | Singlet-A | H-1->L+1 (35%), HOMO->LUMO (61%)                                 |
| 418.8626238     | 0.0258        | Singlet-A | H-1->LUMO (37%), HOMO->L+1 (59%)                                 |
| 336.0255214     | 0.0208        | Singlet-A | H-2->LUMO (87%)                                                  |
| 329.0952292     | 0.0857        | Singlet-A | H-3->LUMO (32%), H-2->L+1 (46%)                                  |
| 326.8396073     | 0.0591        | Singlet-A | H-3->L+1 (81%)                                                   |
| 321.4335182     | 0.2411        | Singlet-A | H-2->L+1 (40%), H-1->LUMO (24%), HOMO->L+1 (13%)                 |
| 317.0442813     | 0.5093        | Singlet-A | H-1->L+1 (47%), HOMO->LUMO (24%)                                 |
| 312.3556714     | 0.3017        | Singlet-A | H-3->LUMO (53%), H-1->LUMO (22%), HOMO->L+1 (12%)                |
| 307.4602273     | 0.0255        | Singlet-A | H-4->LUMO (92%)                                                  |
| 299.3176009     | 0.0338        | Singlet-A | H-4->L+1 (88%)                                                   |
| 287.3576615     | 0.2026        | Singlet-A | H-5->LUMO (91%)                                                  |
| 285.7680741     | 0.2163        | Singlet-A | H-5->L+1 (90%)                                                   |
| 239.8733466     | 0.0026        | Singlet-A | H-6->LUMO (98%)                                                  |
| 238.6773508     | 0.0048        | Singlet-A | H-6->L+1 (98%)                                                   |
| 227.4631454     | 0.0001        | Singlet-A | H-8->LUMO (24%), H-8->L+1 (23%), H-7->LUMO (27%), H-7->L+1 (24%) |
| 220.7405356     | 0.0014        | Singlet-A | H-8->LUMO (31%), H-8->L+1 (14%), H-7->LUMO (33%), H-7->L+1 (17%) |
| 218.3920252     | 0.0024        | Singlet-A | H-8->L+1 (29%), H-7->LUMO (16%), HOMO->L+2 (46%)                 |
| 217.5986111     | 0.0053        | Singlet-A | H-8->LUMO (19%), H-7->L+1 (35%), HOMO->L+3 (33%)                 |
| 212.0932252     | 0.0247        | Singlet-A | H-1->L+2 (17%), H-1->L+3 (34%), HOMO->L+2 (23%)                  |
| 211.9880598     | 0.0349        | Singlet-A | H-1->L+2 (46%), H-1->L+3 (12%), HOMO->L+3 (22%)                  |

Coordinates of the optimized structure 5:

| Tag | Symbol | X         | Y         | Z         |
|-----|--------|-----------|-----------|-----------|
| 1   | N      | 0.014161  | 1.350516  | 0.733769  |
| 2   | N      | 1.225477  | -0.703688 | 0.464859  |
| 3   | N      | -1.178523 | -0.708218 | 0.441754  |
| 4   | O      | 0.104002  | -0.356784 | 2.565101  |
| 5   | C      | -0.671268 | 3.426085  | 0.155624  |
| 6   | C      | 1.148585  | 2.074416  | 0.495222  |
| 7   | C      | 1.257773  | -1.955744 | -0.075787 |
| 8   | C      | 0.038886  | -2.638849 | -0.283122 |
| 9   | C      | 2.373722  | 1.389109  | 0.33342   |
| 10  | C      | 2.381455  | -0.019727 | 0.225352  |
| 11  | C      | -2.325997 | -0.027287 | 0.144796  |
| 12  | C      | -1.188061 | -1.9622   | -0.103494 |
| 13  | C      | 0.720938  | 3.427595  | 0.188373  |
| 14  | C      | -1.108861 | 2.071686  | 0.442234  |
| 15  | C      | -2.325516 | 1.382808  | 0.236897  |
| 16  | C      | 3.302865  | -0.965903 | -0.379605 |
| 17  | C      | 2.609876  | -2.159118 | -0.566043 |
| 18  | C      | -3.221375 | -0.977604 | -0.490603 |
| 19  | C      | 4.719171  | -0.645716 | -0.767302 |
| 20  | H      | 4.756968  | 0.362924  | -1.1991   |
| 21  | H      | 5.048685  | -1.326426 | -1.560501 |
| 22  | C      | -1.589922 | 4.564369  | -0.196993 |
| 23  | H      | -1.110526 | 5.513123  | 0.071328  |
| 24  | H      | -2.495566 | 4.499891  | 0.419316  |
| 25  | C      | -2.519428 | -2.170134 | -0.644341 |
| 26  | C      | -4.621542 | -0.661466 | -0.936289 |
| 27  | H      | -4.917939 | -1.34732  | -1.738018 |
| 28  | H      | -4.643472 | 0.344477  | -1.375368 |
| 29  | C      | 3.103911  | -3.428324 | -1.201703 |
| 30  | H      | 2.309094  | -3.851584 | -1.829377 |
| 31  | H      | 3.935781  | -3.20345  | -1.87901  |
| 32  | C      | 1.651382  | 4.568134  | -0.123436 |
| 33  | H      | 2.524894  | 4.510815  | 0.53814   |
| 34  | H      | 1.154604  | 5.515941  | 0.114822  |
| 35  | B      | 0.023545  | -0.109717 | 1.150364  |
| 36  | C      | -2.985121 | -3.441619 | -1.296836 |
| 37  | H      | -2.168557 | -3.85866  | -1.900268 |
| 38  | H      | -3.797116 | -3.220869 | -1.999081 |
| 39  | C      | -1.999728 | 4.613198  | -1.68344  |
| 40  | H      | -1.125414 | 4.740658  | -2.329293 |

|    |   |           |           |           |
|----|---|-----------|-----------|-----------|
| 41 | H | -2.683818 | 5.448877  | -1.868767 |
| 42 | H | -2.501734 | 3.688997  | -1.987047 |
| 43 | C | 2.135459  | 4.610945  | -1.587703 |
| 44 | H | 2.657784  | 3.688242  | -1.85985  |
| 45 | H | 2.823074  | 5.449804  | -1.743072 |
| 46 | H | 1.294252  | 4.729232  | -2.277794 |
| 47 | C | 3.556348  | -4.49364  | -0.18236  |
| 48 | H | 4.384443  | -4.123212 | 0.430486  |
| 49 | H | 3.890723  | -5.402981 | -0.694275 |
| 50 | H | 2.739385  | -4.76358  | 0.494636  |
| 51 | C | 5.71346   | -0.722466 | 0.409414  |
| 52 | H | 5.429489  | -0.033095 | 1.211123  |
| 53 | H | 6.725764  | -0.463977 | 0.078959  |
| 54 | H | 5.740803  | -1.730831 | 0.834885  |
| 55 | C | -3.461538 | -4.511944 | -0.293807 |
| 56 | H | -2.663971 | -4.777194 | 0.407744  |
| 57 | H | -3.772938 | -5.422886 | -0.817168 |
| 58 | H | -4.311437 | -4.148966 | 0.293222  |
| 59 | C | -5.663099 | -0.733251 | 0.198956  |
| 60 | H | -5.705464 | -1.738942 | 0.629662  |
| 61 | H | -6.661743 | -0.479932 | -0.174214 |
| 62 | H | -5.414762 | -0.037138 | 1.006854  |
| 63 | C | -0.921262 | 0.106611  | 3.416442  |
| 64 | H | -1.027998 | 1.201695  | 3.375848  |
| 65 | H | -0.6647   | -0.174073 | 4.443266  |
| 66 | H | -1.895874 | -0.342941 | 3.170718  |
| 67 | H | 0.046305  | -3.620473 | -0.743068 |
| 68 | H | 3.276693  | 1.948694  | 0.117513  |
| 69 | H | -3.219923 | 1.937942  | -0.021737 |

## References:

S1) Oxford Diffraction (2008). CrysAlis CCD and CrysAlis RED. Versions 1.171.33.55. Oxford Diffraction Ltd, Yarnton, Oxfordshire, England.

S2) Sheldrick, G. M.; SHELXS-97 and SHELXL-97, Programs for the Solution and Refinement of Crystal Structures, University of Göttingen, Germany, 1997.

S3) (a) Spek, A. L.; PLATON, A Multipurpose Crystallographic Tool, Utrecht University, Utrecht, The Netherlands, 2002; (b) Spek, A. L.; *J. Appl. Cryst.* **2003**, *36*, 7-13.

S4) SQUEEZE. Sluis, P. v. d.; Spek, A. L. *Acta Cryst.* **1990**, *A46*, 194-201.

S5) WinGX v1.80.05. Farrugia, L. J. *J. Appl. Cryst.* **1999**, 32, 837-838.

S6) Gaussian 09, Revision C.01, M. J. Frisch, G. W. Trucks, H. B. Schlegel, G. E. Scuseria, M. A. Robb, J. R. Cheeseman, G. Scalmani, V. Barone, B. Mennucci, G. A. Petersson, H. Nakatsuji, M. Caricato, X. Li, H. P. Hratchian, A. F. Izmaylov, J. Bloino, G. Zheng, J. L. Sonnenberg, M. Hada, M. Ehara, K. Toyota, R. Fukuda, J. Hasegawa, M. Ishida, T. Nakajima, Y. Honda, O. Kitao, H. Nakai, T. Vreven, J. A. Montgomery, Jr., J. E. Peralta, F. Ogliaro, M. Bearpark, J. J. Heyd, E. Brothers, K. N. Kudin, V. N. Staroverov, T. Keith, R. Kobayashi, J. Normand, K. Raghavachari, A. Rendell, J. C. Burant, S. S. Iyengar, J. Tomasi, M. Cossi, N. Rega, J. M. Millam, M. Klene, J. E. Knox, J. B. Cross, V. Bakken, C. Adamo, J. Jaramillo, R. Gomperts, R. E. Stratmann, O. Yazyev, A. J. Austin, R. Cammi, C. Pomelli, J. W. Ochterski, R. L. Martin, K. Morokuma, V. G. Zakrzewski, G. A. Voth, P. Salvador, J. J. Dannenberg, S. Dapprich, A. D. Daniels, O. Farkas, J. B. Foresman, J. V. Ortiz, J. Cioslowski, and D. J. Fox, Gaussian, Inc., Wallingford CT, 2010.
